# Supplementary material
Source: PubMed Central journal article supplement (PMC3157544)
Supplement: NIHMS303172-supplement-1.pdf [file NIHMS303172-supplement-1.pdf]

## SUPPLEMENTAL MATERIAL

**Table S1. Information on Genotyped SNPs of SCNN1A, SCNN1B, and SCNN1G**

| Gene   | Chr | SNP        | Position | Region in Gene | MAF  | Alleles* | HW p-values |
|--------|-----|------------|----------|----------------|------|----------|-------------|
| SCNN1A | 12  | rs4149621  | 6321822  | 3' Flanking    | 0.08 | T:C      | 0.48        |
|        |     | rs4149570  | 6321851  | 3' Flanking    | 0.50 | C:A      | 0.63        |
|        |     | rs11064145 | 6325359  | 3' Flanking    | 0.21 | T:G      | 0.33        |
|        |     | rs13306613 | 6335070  | Intron         | 0.06 | C:T      | 0.26        |
|        |     | rs3782724  | 6336342  | Intron         | 0.24 | A:G      | 0.90        |
|        |     | rs7956915  | 6340521  | Intron         | 0.40 | C:T      | 0.40        |
|        |     | rs11064153 | 6358711  | 5' Flanking    | 0.35 | G:A      | 0.05        |
| SCNN1B | 16  | rs1004749  | 23222352 | Intron         | 0.34 | A:C      | 0.22        |
|        |     | rs3785368  | 23228281 | Intron         | 0.35 | G:A      | 0.32        |
|        |     | rs11074555 | 23231527 | Intron         | 0.30 | A:G      | 0.18        |
|        |     | rs7205273  | 23232350 | Intron         | 0.26 | C:T      | 0.20        |
|        |     | rs239345   | 23253439 | Intron         | 0.28 | T:A      | 0.10        |
|        |     | rs7190829  | 23254805 | Intron         | 0.18 | A:G      | 0.70        |
|        |     | rs8055868  | 23255752 | Intron         | 0.20 | G:A      | 0.88        |
|        |     | rs12447134 | 23258170 | Intron         | 0.08 | A:C      | 0.39        |
|        |     | rs239349   | 23260349 | Intron         | 0.48 | G:A      | 0.04        |
|        |     | rs238547   | 23267700 | Exon (syn)     | 0.03 | C:T      | 1           |
|        |     | rs8044970  | 23269331 | Intron         | 0.38 | T:G      | 0.33        |
|        |     | rs8044984  | 23269354 | Intron         | 0.31 | A:C      | 0.11        |
|        |     | rs152733   | 23270179 | Intron         | 0.45 | A:G      | 0.46        |
|        |     | rs3785361  | 23270900 | Intron         | 0.29 | T:A      | 0.49        |
|        |     | rs63982    | 23271582 | Intron         | 0.38 | G:T      | 1           |

|        |    |            |          |             |      |     |      |
|--------|----|------------|----------|-------------|------|-----|------|
|        |    | rs238551   | 23283422 | Intron      | 0.50 | A:G | 0.32 |
|        |    | rs239350   | 23286980 | Intron      | 0.13 | G:A | 0.02 |
|        |    | rs889299   | 23289415 | Intron      | 0.34 | G:A | 0.63 |
|        |    | rs12596831 | 23292758 | Intron      | 0.13 | C:T | 0.04 |
|        |    | rs4967999  | 23295036 | Intron      | 0.45 | C:T | 0.92 |
|        |    | rs168748   | 23295756 | Intron      | 0.45 | G:A | 0.29 |
|        |    | rs2303153  | 23297702 | Intron      | 0.11 | G:C | 0.76 |
|        |    | rs250567   | 23301900 | 3' Flanking | 0.10 | G:A | 0.29 |
|        |    | rs181835   | 23304614 | 3' Flanking | 0.33 | A:G | 0.76 |
| SCNN1G | 16 | rs4421986  | 23098751 | 5' Flanking | 0.06 | C:T | 0.04 |
|        |    | rs4073930  | 23103147 | Intron      | 0.16 | T:C | 0.03 |
|        |    | rs4073291  | 23103494 | Intron      | 0.16 | T:G | 0.02 |
|        |    | rs7404408  | 23104239 | Intron      | 0.16 | C:T | 0.01 |
|        |    | rs4967948  | 23106745 | Intron      | 0.01 | G:A | 1    |
|        |    | rs5735     | 23108349 | Exon (syn)  | 0.17 | T:C | 0.09 |
|        |    | rs4247210  | 23113158 | Intron      | 0.16 | G:C | 0.57 |
|        |    | rs13331086 | 23115618 | Intron      | 0.06 | A:C | 0.59 |
|        |    | rs4299163  | 23119520 | Intron      | 0.10 | G:C | 0.35 |
|        |    | rs4401050  | 23124903 | Intron      | 0.09 | C:T | 0.85 |
|        |    | rs4499238  | 23128880 | Intron      | 0.10 | G:A | 0.25 |
|        |    | rs4297681  | 23132542 | Intron      | 0.06 | C:A | 1    |
|        |    | rs5723     | 23134288 | Exon (syn)  | 0.06 | C:G | 0.62 |
|        |    | rs5728     | 23134863 | 3' UTR      | 0.19 | A:G | 1    |
|        |    | rs9930846  | 23136036 | 3' Flanking | 0.06 | T:C | 0.53 |

\*Major allele: minor allele.

**Figure S1.** Linkage disequilibrium structure of the SCNN1A (a), SCNN1B (b), and SCNN1G (c) genes. The D' color scheme of Haploview was applied and  $r^2 \times 100$  are shown in each cell ( $r^2$  values of 1.0 are not shown).

a.

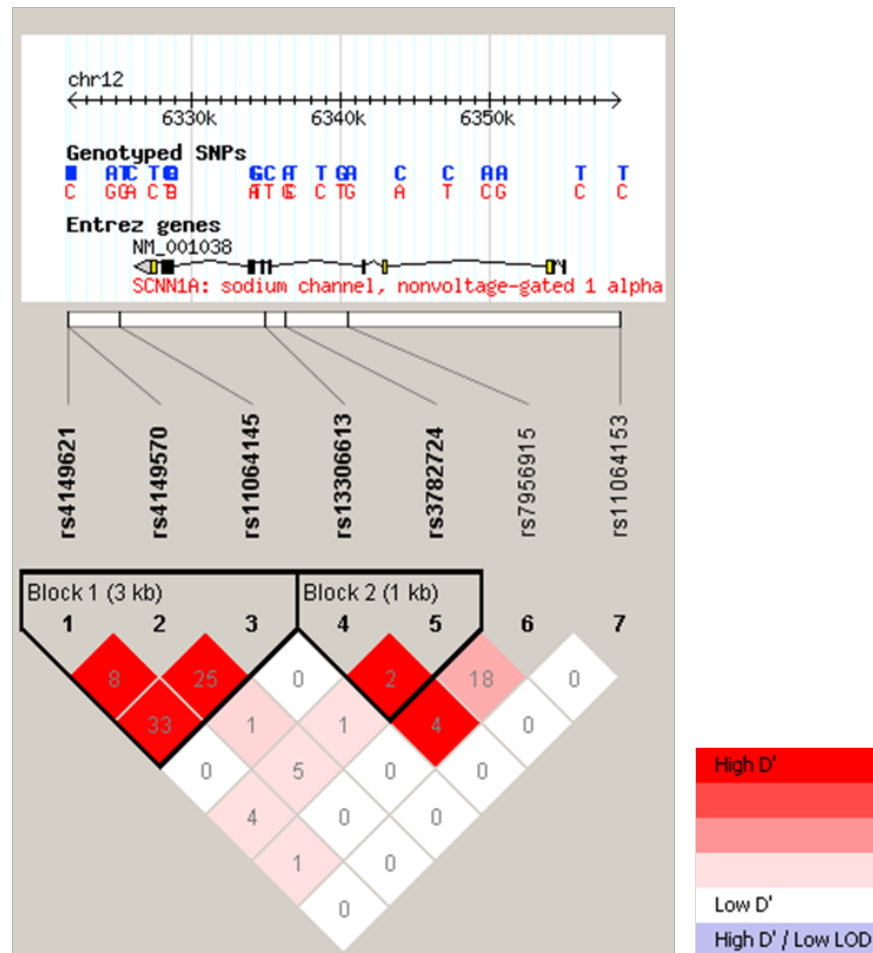





## **GenSalt Collaborative Research Group**

**Tulane University Health Sciences Center, New Orleans, LA, USA:** Jiang He (PI), Lydia A. Bazzano, Chung-Shiuan Chen, Jing Chen, Hao Mei, L. Lee Hamm, Tanika N. Kelly, Paul Muntner, Kristi Reynolds, Paul K. Whelton, Wenjie Yang, and Qi Zhao.

**Washington University School of Medicine, St Louis, MO, USA:** Dabeeru C. Rao (PI), Matthew Brown, Charles Gu, Hongyan Huang, Treva Rice, Karen Schwander, and Shiping Wang.

**University of Texas Health Sciences Center at Houston, Houston, TX, USA:** James E. Hixson (PI) and Lawrence C. Shimmin.

**National Heart, Lung, and Blood Institute, Bethesda, MD, USA:** Cashell E. Jaquish.

**Chinese Academy of Medical Sciences, Beijing, China:** Dongfeng Gu (PI), Jie Cao, Jichun Chen, Jingping Chen, Zhenhan Du, Jianfeng Huang, Hongwen Jiang, Jianxin Li, Xiaohua Liang, Depei Liu, Xiangfeng Lu, Donghua Liu, Qunxia Mao, Dongling Sun, Hongwei Wang, Qianqian Wang, Xigui Wu, Ying Yang, and Dahai Yu.

**Shandong Academy of Medical Sciences, Shandong, China:** Fanghong Lu (PI), Zhendong Liu, Shikuan Jin, Yingxin Zhao, Shangwen Sun, Shujian Wang, Qengjie Meng, Baojin Liu, Zhaodong Yang, and Chuanrui Wei.

**Shandong Center for Diseases Control and Prevention, Shandong, China:** Jixiang Ma (PI), Jiyu Zhang, and Junli Tang.

**Zhengzhou University, Henan, China:** Dongsheng Hu (PI), Hongwei Wen, Chongjian Wang, Minghui Shen, Jingjing Pan, and Liming Yang.

**Xinle Traditional Chinese Medicine Hospital, Hebei, China:** Xu Ji (PI), Rongyan Li, Haijun Zu, and Junwei Song.

**Ganyu Center for Disease Control and Prevention, Jiangsu, China:** Delin Wu (PI), Xushan Wang, and Xiaofeng Zhang.

**Xi'an Jiaotong University, Shaanxi, China:** Jianjun Mu (PI), Enrang Chen, Fuqiang Liu, and Guanji Wu.

**Chinese National Human Genome Center at Beijing, Beijing, China:** Zhi-Jian Yao (PI), Shufeng Chen, Dongfeng Gu, Hongfan Li, Laiyuan Wang, and Penghua Zhang.
